# Supplementary material for: Flaxseed Lignan Alleviates the Paracetamol-Induced Hepatotoxicity Associated with Regulation of Gut Microbiota and Serum Metabolome
Source: MDPI journal article supplement (doi:10.3390/nu16020295), 2024-01-18

## Supplemental file

**Table S1.** The composition of a standard diet.

| AIN93M                        | gm%     | kcal% |
|-------------------------------|---------|-------|
| Fat                           | 4       | 9.4   |
| Protein                       | 14.2    | 14.7  |
| Carbohydrate                  | 73.1    | 75.9  |
| kcal/gm                       |         | 3.85  |
| Ingredient                    | gm      | kcal  |
| Casein, 30 Mesh               | 140     | 560   |
| L-Cystine                     | 1.8     | 7.2   |
| Corn Starch                   | 495.692 | 1983  |
| Maltodextrin 10               | 125     | 500   |
| Sucrose                       | 100     | 400   |
| Cellulose                     | 50      | 0     |
| Soybean Oil                   | 40      | 360   |
| t-Butylhydroquinone           | 0.008   | 0     |
| Mineral Mix S10022M           | 35      | 0     |
| Vitamin Mix V10037            | 10      | 40    |
| Choline Bitartrate            | 2.5     | 0     |
| Total                         | 1000    | 3850  |
| *Soluble fiber/carbohydrate   | 540.85  |       |
| *Insoluble fiber/carbohydrate | 50.49   |       |

**Figure S1** Super class distribution of significantly changed metabolites in each pair-group.

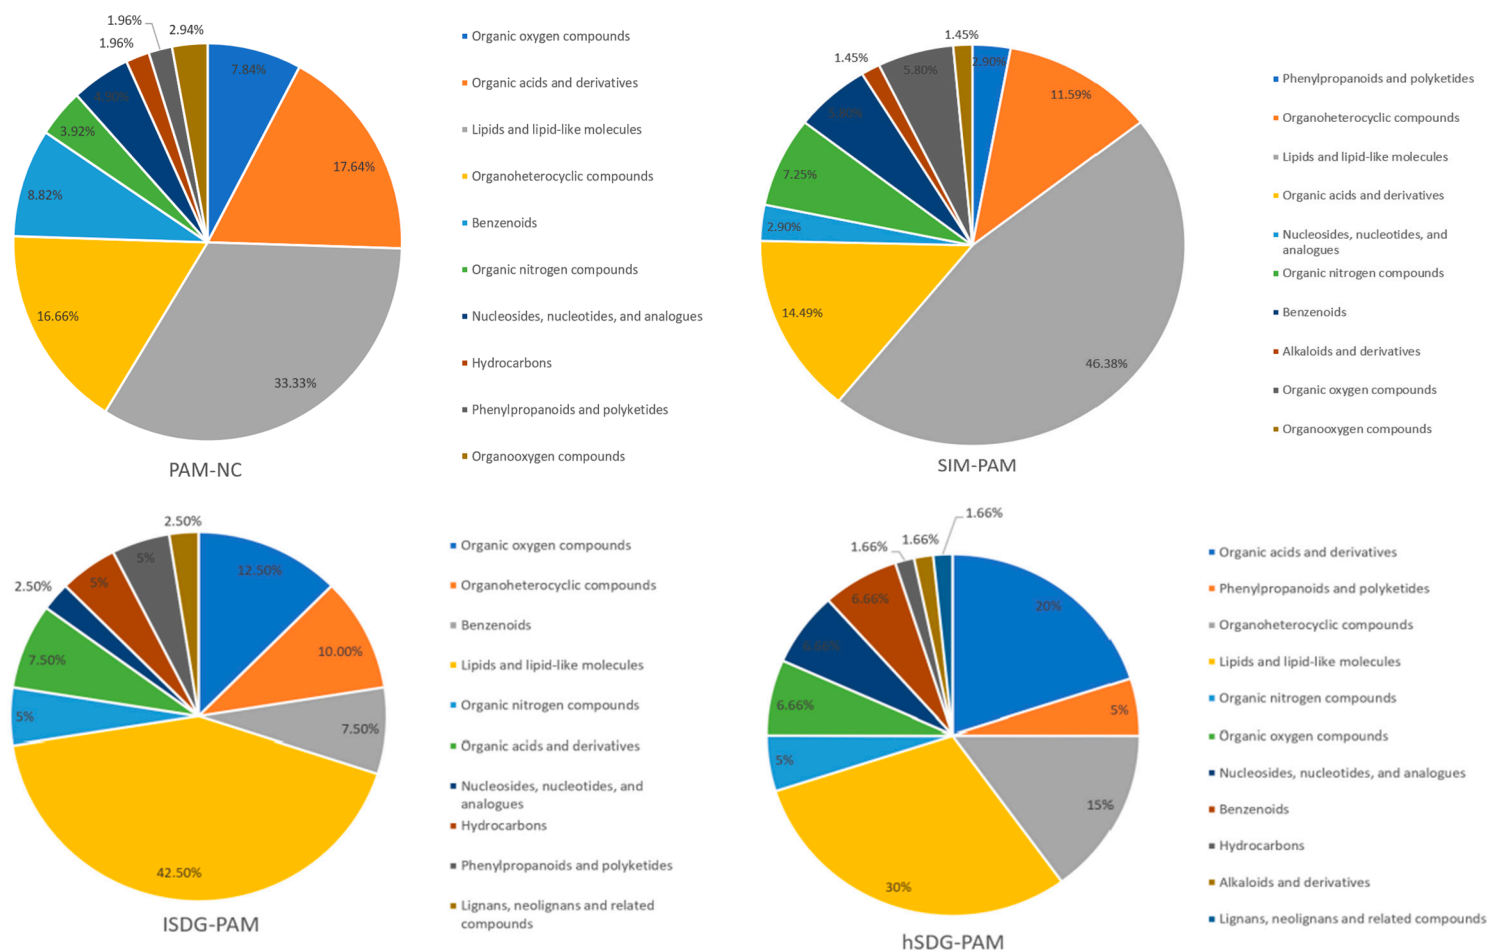

Figure S2 Heatmap of Spearman's correlation between changed metabolites and biochemical parameters.

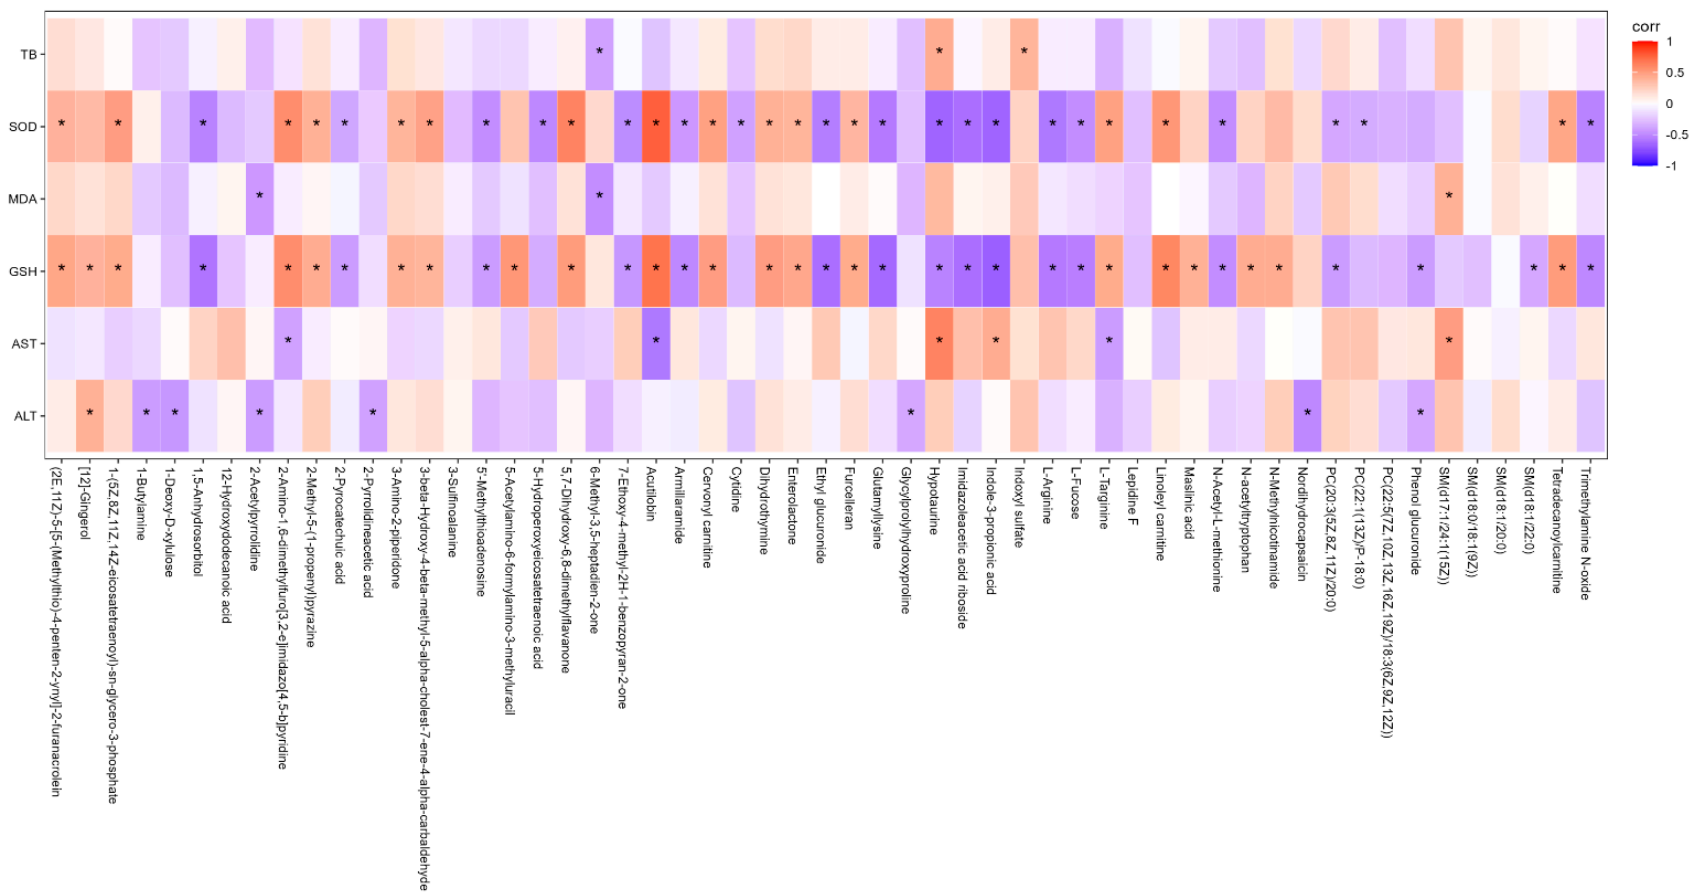

Supplement: s1 [file s1]
